# Supplementary material
Source: publisher figshare collection journal article supplement (https://tandf.figshare.com/articles/dataset/_/1601911)

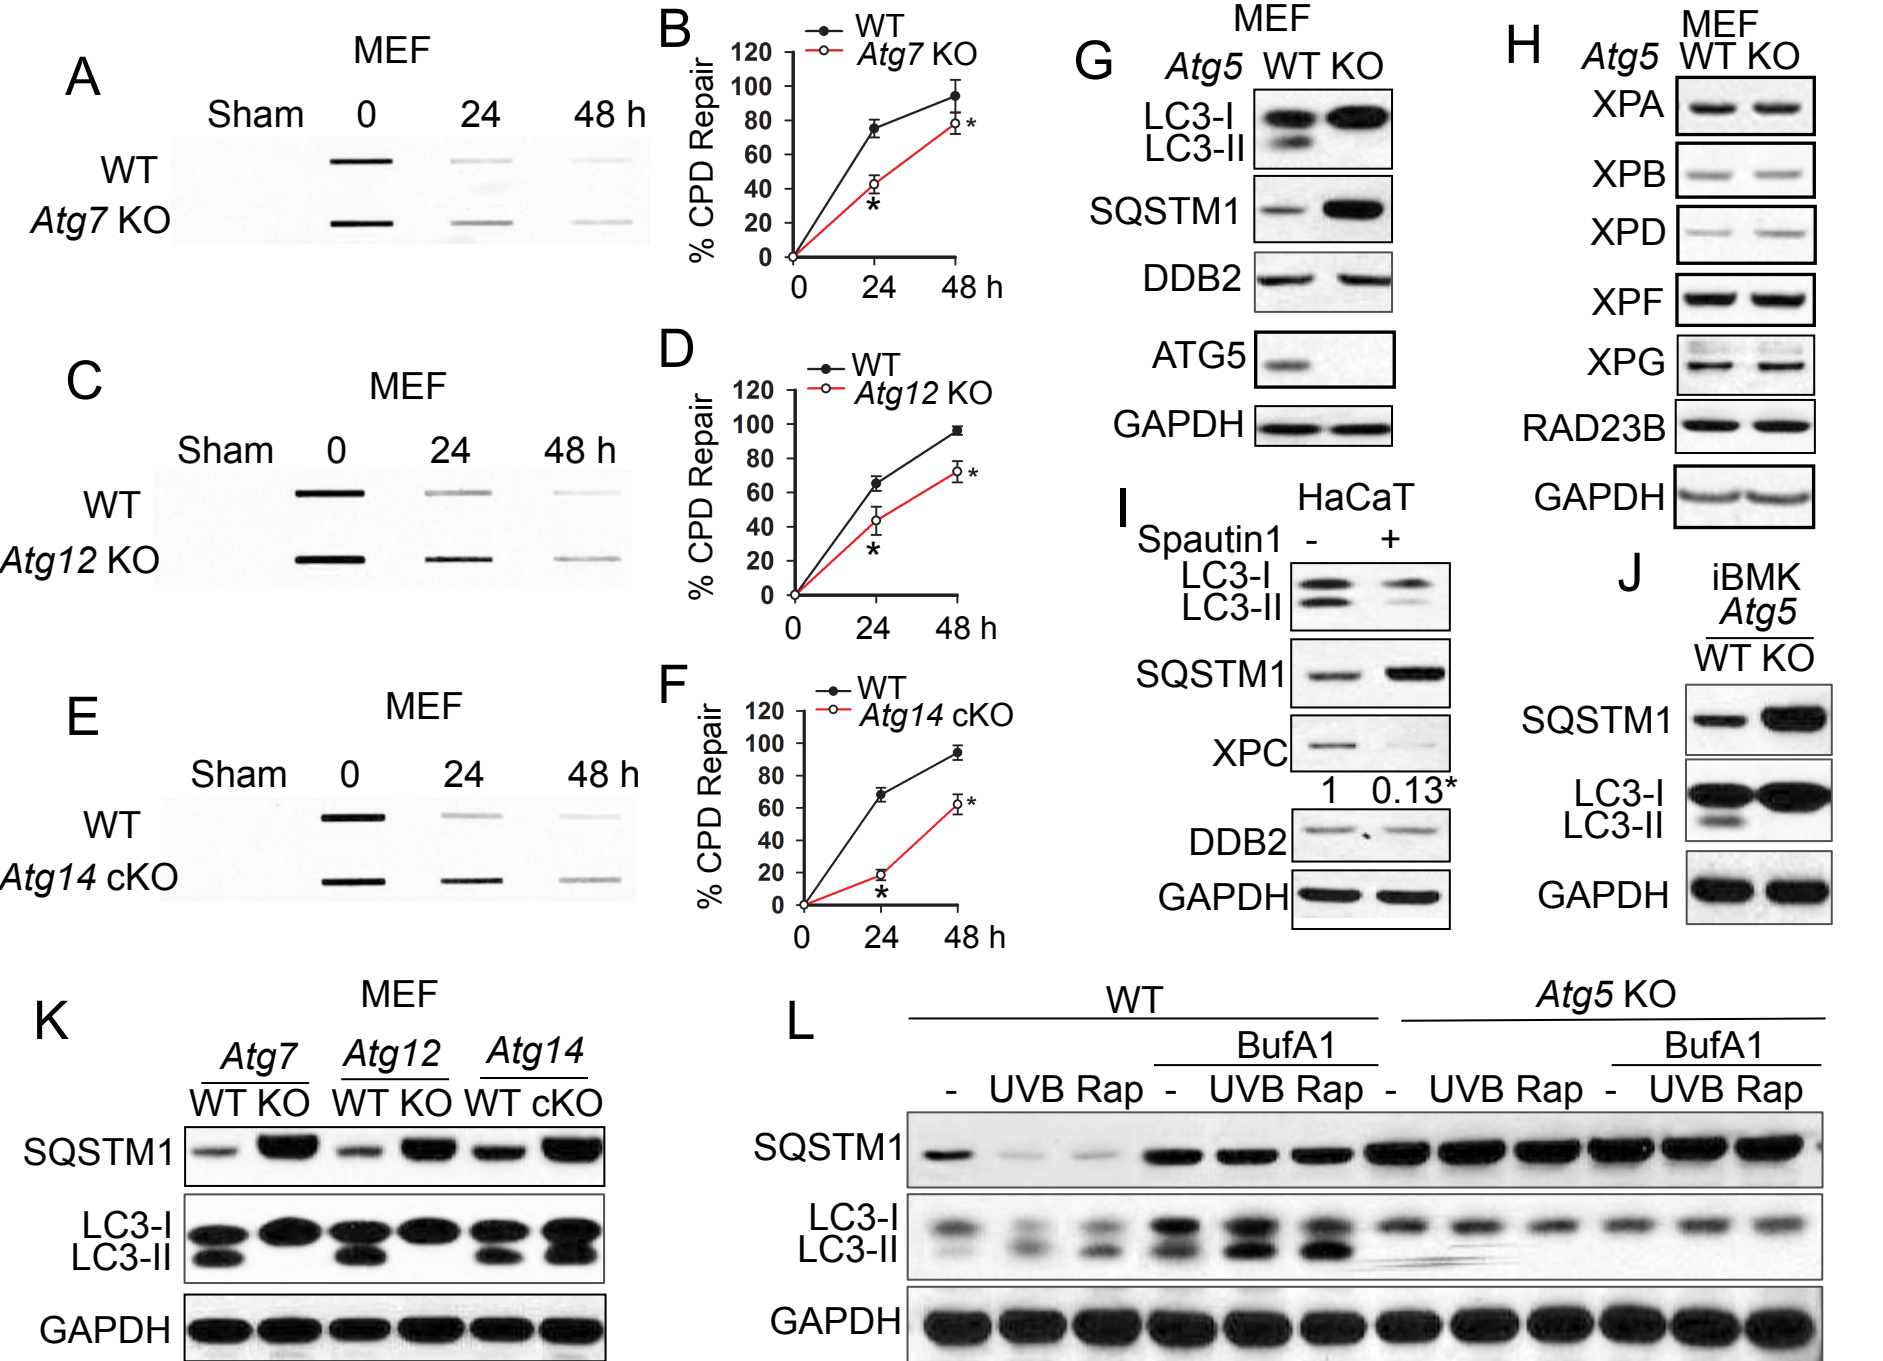

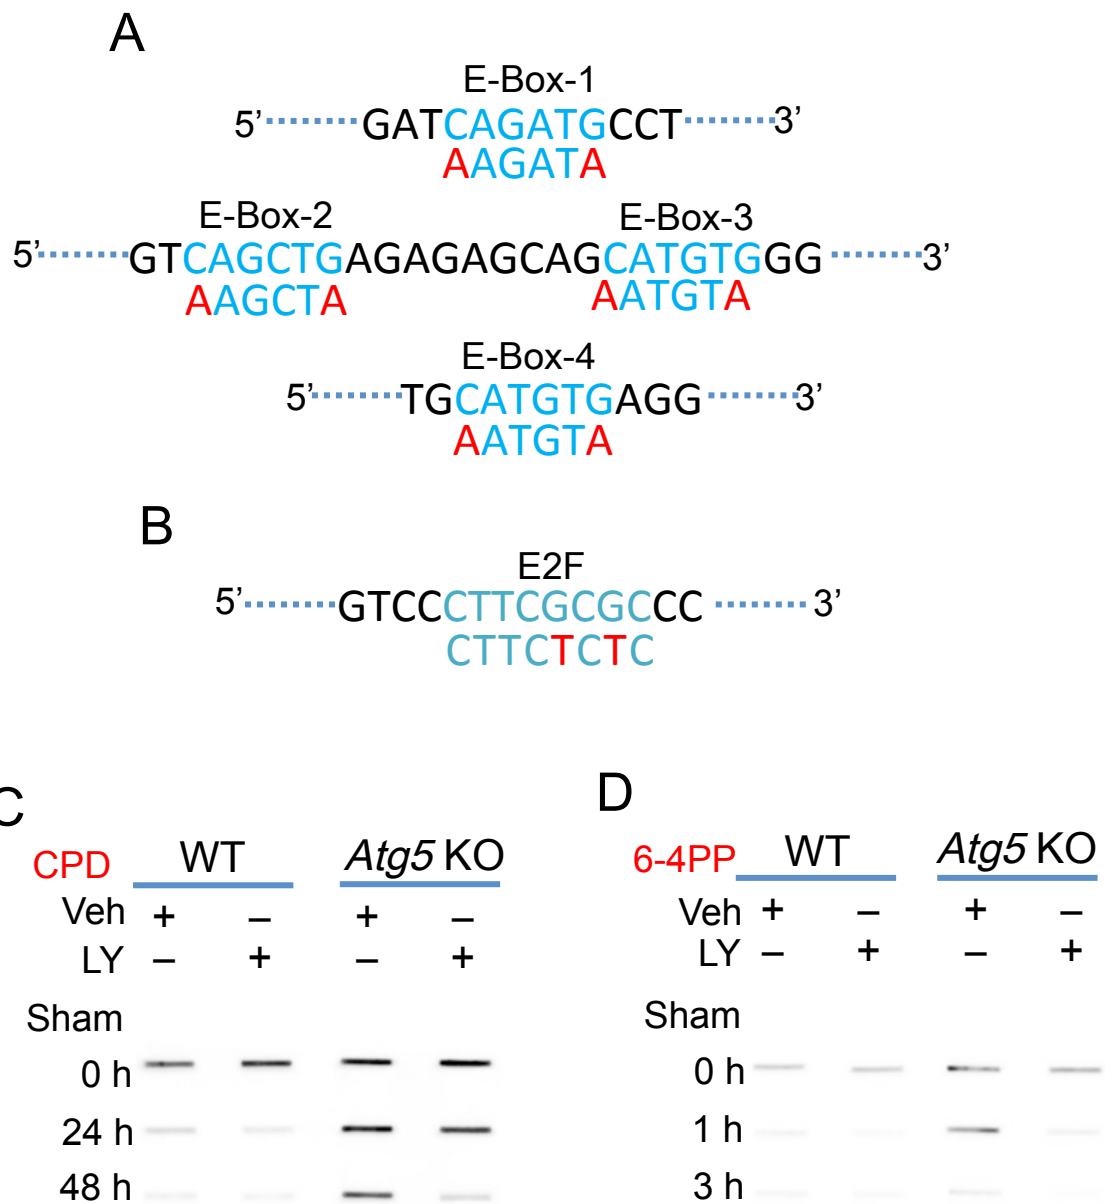

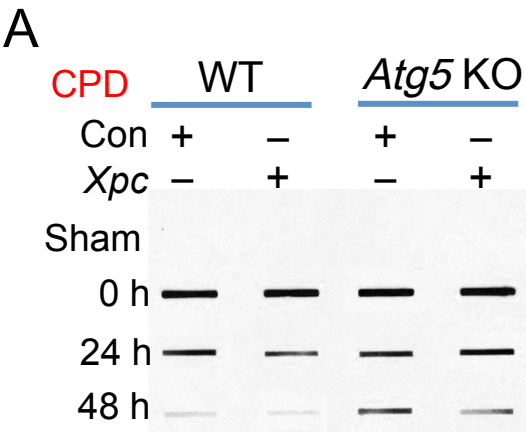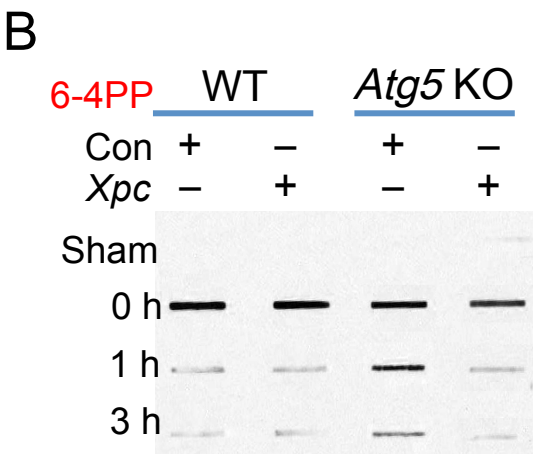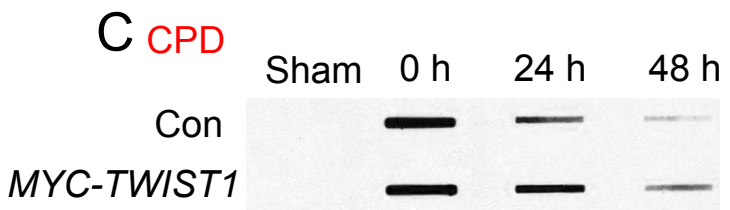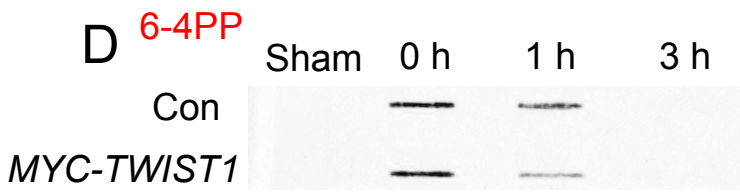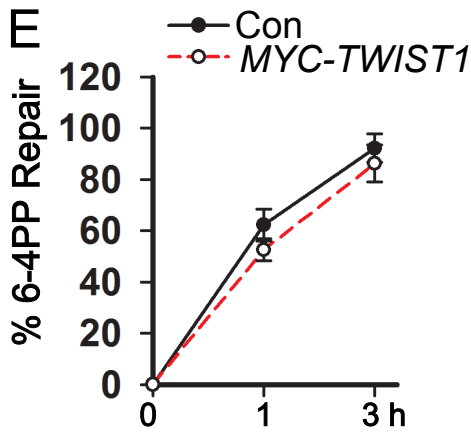

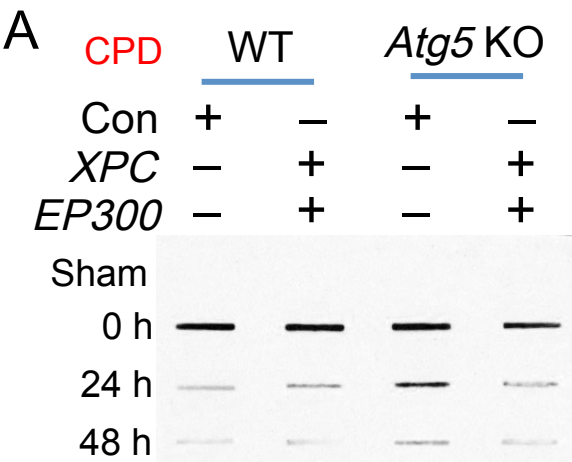

**B**

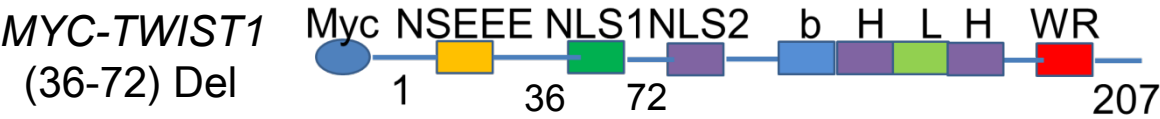

Supplement: Supplementary file 1 [file 1]
